# Supplementary material for: A Split NanoLuc Reporter Quantitatively Measures Circular RNA IRES Translation
Source: MDPI journal article supplement (doi:10.3390/genes13020357), 2022-02-16
Supplement: s1 [file s1]

### EMCV split nanoLuc 117/118

CGTACTAATGACTTTTTTTTATACTTCAGGGCATCGCCGTGTTTCGACGGCAAAAAGATCACTGTAACAGGGACCCCT  
GTGGAACGGCAACAAAATTATCGACGAGCGCCTGATCAACCCCGACGGCTCCCTGCTGTTCCGAGTAACCATCAAC  
GGAGTGACCGGCTGGCGGCTGTGCGAACGCATTCTGGCGTAACCTGCAGGCGCCCTCTCCCTCCCCCCCCCTAA  
CGTTACTGGCCGAAGCCGCTTGGAATAAGGCCGGTGTGCGTTTGTCTATATGTTATTTTCCACCATATTGCCGCTCTT  
TTGGCAATGTGAGGGCCCGAAACCTGGCCCTGTCTTCTTGACGAGCATTCTAGGGGTCTTTCCCTCTCGCCAA  
AGGAATGCAAGGTCTGTTGAATGTCGTGAAGGAAGCAGTTCCTCTGGAAGCTTCTGAAGACAAACAACGTCTGT  
AGCGACCCCTTGCAGGCAGCGGAACCCCCACCTGGCGACAGGTGCCTCTGCGGCCAAAAGCCACGTGTATAAGA  
TACACCTGCAAAGGCGGCACAACCCAGTGCCACGTTGTGAGTTGGATAGTTGTGGAAGAGTCAAATGGCTCTC  
CTCAAGCGTATTCAACAAGGGGCTGAAGGATGCCAGAAGGTACCCATTGTATGGGATCTGATCTGGGGCCTCG  
GTGCACATGCTTTACATGTGTTTAGTCGAGGTTAAAAAACGTCTAGGCCCCCGAACCACGGGGACGTGGTTTTT  
CTTTGAAAAACACGATGATAATATGCGCTTAACCACCatggcGATATCATGGTCTTCACACTCGAAGATTTCGTTGG  
GGACTGGCGACAGACAGCCGGCTACAACCTGGACCAAGTCCTGAACAGGGAGGTGTGTCCAGTTTGTTCAGAA  
TCTCGGGGTGTCCGTAACCTCCGATCCAAAGGATTGTCTGAGCGGTGAAAATGGGCTGAAGATCGACATCCATGT  
CATCATCCCGTATGAAGGTCTGAGCGGCGACCAATGGGCCAGATCGAAAAAATTTTAAAGGTGGTGTACCCTGT  
GGATGATCATCACTTTAAGGTGATCCTGCACTATGGCACACTGGTAATCGACGGGGTTACGCCGAACATGATCGA  
CTATTCGACGCGCGTATGAGGTAAGAAGCAAGGTTTCATTTAGGGGAAGGG

Magenta and cyan: sequences overlapping with plasmid for Gibson Assembly cloning

EMCV IRES

ATG and TAA: Start and Stop codons for the nanoLuc open reading frame

CCTGCAGG and GATATC: SbfI and EcoRV cloning sites

### Uganda ZIKV full 3-5 UTR split Minigenome insert 607nt

GCGAACGCATTCTGGCGTAACCTGCAGGgaccaatttttagtgtgtcaggcctgtagtcagccacagtttgggaaagctgtgcagcc  
tgtaacccccccaggagaagctgggaaaccaagctcatagtcaggccgagaacgcatggcacggaagaagccatgctgctgtgagccctcaga  
ggacactgagtcaaaaaacccacgcgcttggaagcgcaggatgggaaaagaaggtggcgaccttccccacccttaacttggggcctgaactgga  
gactagctgtgaatctccagcagagggactagtgttagaggagacccccggaaaacgcaaacagcatattgacgtgggaaagaccagagact  
ccatgagtttccaccacgtggccgagcagatcgccgaacttcggcgccggtgtgggaaatccatggtttctagtgttgatctgtgtgagtc  
agactgcgacagttcagctgaagcgagagctaacaacagtttaatttggatttggaaacgagagtttctgtgtatgaaaaacccaa  
agaagaaatccggaggattccggattgtcaatatgtctaaacgcggaGATATCATGGTCTTCACACTCGAAG

### Uganda ZIKV full 5-3 UTR split Minigenome 1190 nt \$209/159

GCGAACGCATTCTGGCGTAACCTGCAGGagttgttgatctgtgtgagtcagactgcgacagttcagctgaagcgagagctaacaaca  
gtatcaacaggtttaatttggatttggaaacgagagtttctgttcgaccaatttttagtgtgtcaggcctgtagtcagccacagtttgggaaagctg  
tgagcctgttaacccccccaggagaagctgggaaaccaagctcatagtcaggccgagaacgcatggcacggaagaagccatgctgctgtgagcc  
cctcagaggacactgagtcaaaaaacccacgcgcttggaagcgcaggatgggaaaagaaggtggcgaccttccccacccttaacttggggcctg  
aactggagactagctgtgaatctccagcagagggactagtgttagaggagacccccggaaaacgcaaacagcatattgacgtgggaaagacc  
agagactccatgagtttccaccacgtggccgagcagatcgccgaacttcggcgccggtgtgggaaatccatggtttctatgaaaaaccca  
aagaagaaatccggaggattccggattgtcaatatgtctaaacgcggaGATATCATGGTCTTCACACTCGAAG

ATG and TAA: Start and Stop codons

5' UTR and 3' UTR sequences and the capsid protein open reading frame portion from the ZIKV genome

CCTGCAGG and GATATC: SbfI and EcoRV cloning sites

Figure S1: gene block sequences

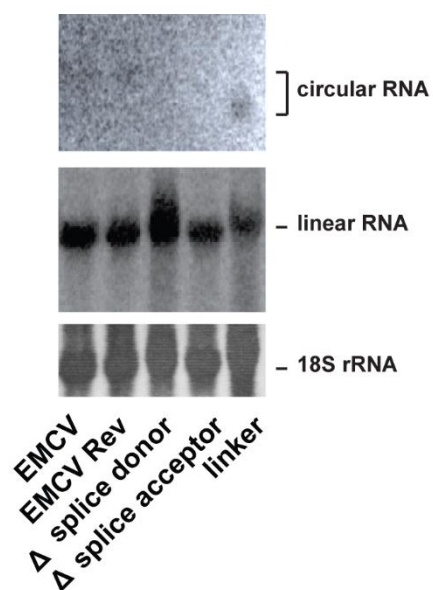

**Figure S2:** Northern blot analysis to detect circular, linear NanoLuc and 18S rRNA as a control. 10  $\mu$ g of total RNA from stably transfected cells were separated by denaturing agarose gel electrophoresis, followed by northern blot analysis using an oligonucleotide hybridized to the NanoLuc splice junction to detect the circular RNA, and to the C-terminal fragment of the NanoLuc to detect the linear RNA.

**Figure S2: northern blot**

Table S1: primer sequences.

| Primer Name           | Primer Sequence                           | Purpose                              |
|-----------------------|-------------------------------------------|--------------------------------------|
| EMCV Rev SbfI Rev     | GGCCCTGCAGGggccatGGTGGTTAACGCCATATTATC    | cloning                              |
| EMCV Rev EcoRV Fwd    | GCGGATATCCGCCCCTCTCCCTCCCCCCCCCT          | cloning                              |
| SbfI-9 bp-EcoRV Fwd   | GGCCTTACTTCGAT                            | cloning                              |
| SbfI-9 bp-EcoRV Rev   | ATCGAAGTAAGGCCTGCA                        | cloning                              |
| nanoLuc N HindIII Fwd | GGGAAGCTTACCATGGTCTTCACACTCGAAGATTTC      | cloning                              |
| nanoLuc N BamHI Rev   | GCGGGATCCTTACTCATACGGCCGTCCGAAATAG        | cloning                              |
| nanoLuc C HindIII Fwd | GGGAAGCTTACCATGGGCATCGCCGTGTTTCGACGG      | cloning                              |
| nanoLuc C BamHI       | GCGGGATCCTTACGCCAGAATGCGTTTCGCAC          | cloning                              |
| Splice donor Fwd      | AAGAAGCAAGGTTTCATTTAGGGGAAG               | cloning                              |
| Splice donor Rev      | CTCATACGGCCGTCCGAAATAGTCG                 | cloning                              |
| Splice acceptor Fwd   | GGCATCGCCGTGTTTCGACGGC                    | mutagenesis                          |
| Splice acceptor Rev   | GAAGTATAAAAAAAAAAGTCATTAGTACG             | mutagenesis                          |
| SbfI Myc 5'UTR Fwd    | GCG CCTGCAGG GAC CCC CGA GCT GTG CTG C    | cloning                              |
| EcoRV Myc 5'UTR Rev   | GGGGATATCCATGGTCTGGTT TTCCACTACCCGAAAAA   | cloning                              |
| SbfI DAP5 5'UTR Fwd   | GCG CCTGCAGG gccagcagtgagtcggagct         | cloning                              |
| EcoRV DAP5 5'UTR Rev  | GGG GATATC cgactctccactttggcgg            | cloning                              |
| SbfI cJun 5'UTR Fwd   | GCG CCTGCAGGgctcagagttgcactgagtg          | cloning                              |
| EcoRV cJun 5'UTR Rev  | GGG GATATCcatagaacagtcctgcacttcacgtg      | cloning                              |
| ZIKV SbfI 3UTR Fwd    | GCGTAACCTGCAGGgcaccaatttagtggtgtcaggc     | ZIKV insertion                       |
| ZIKV SbfI 5UTR Fwd    | GCGTAACCTGCAGGagtggtgtgatctgtgtgagtcagact | ZIKV insertion                       |
| ZIKV SbfI Capsid Rev  | CCATGATATCtccgcgttttagcatattgacaat        | ZIKV insertion                       |
| ZSCAN Fwd             | GTAAGAAGCAAGGTTTCATTTAGGG                 | sequencing, gene block amplification |
| ZSCAN Rev             | CTGAAGTATAAAAAAAAAAGTCATTAGTAC            | sequencing, gene block amplification |
| nanoLuc Fwd           | GGGGATATCATGGTCTTCACACTCGAAG              | sequencing                           |
| nanoLuc Rev           | GCGCCTGCAGGTTACGCCAGAATGCGTTTCGC          | sequencing and northern              |
| nanoLuc junction      | GCGATGCCCTCATACGGC                        | northern                             |
| NheI-FF Fwd           | GGGGCTAGCACCATGGAAGACGCCAAAAACATAAAG      | cloning                              |
| BamHI FF Rev          | GCGGGATCCTTACACGGCGATCTTCCGCCC            | cloning                              |
